# Supplementary material for: Biosynthesis of Polyunsaturated Fatty Acids in the Oleaginous Marine Diatom Fistulifera sp. Strain JPCC DA0580
Source: Mar Drugs. 2013 Dec 11;11(12):5008–23. doi: 10.3390/md11125008 (PMC3877899; doi:10.3390/md11125008)
Supplement: Supplementary File 1 — Supplementary Material (PDF, 16 KB) [file marinedrugs-11-05008-s001.pdf]

## Supplementary Material

**Table S1.** The fatty acid composition in *Fistulifera* sp. over incubation time GC-MS detection was repeated three times.

| Name       | 48 h-mol% | 96 h-mol% | 144 h-mol% |
|------------|-----------|-----------|------------|
| 14:0       | 4.5 ±0.1  | 3.0 ±0.0  | 2.9 ±0.0   |
| 16:0       | 29.8 ±0.2 | 37.3 ±0.2 | 36.5 ±0.0  |
| 16:1       | 36.3 ±0.3 | 42.4 ±0.3 | 45.9 ±0.0  |
| 16:2 $n$ 4 | 2.5 ±0.0  | 0.7 ±0.0  | 0.6 ±0.0   |
| 16:3 $n$ 4 | 3.0 ±0.4  | 1.1 ±0.0  | 0.8 ±0.0   |
| 18:0       | 0.6 ±0.0  | 0.6 ±0.0  | 0.6 ±0.0   |
| 18:1 $n$ 9 | 1.1 ±0.0  | 1.4 ±0.0  | 1.3 ±0.0   |
| 18:1 $n$ 7 | 0.3 ±0.0  | 0.5 ±0.0  | 0.8 ±0.0   |
| 18:2 $n$ 6 | 0.9 ±0.0  | 0.7 ±0.0  | 0.6 ±0.0   |
| 18:3 $n$ 6 | 2.7 ±0.0  | 2.9 ±0.1  | 2.8 ±0.0   |
| 20:3 $n$ 6 | 0.2 ±0.0  | 0.3 ±0.0  | 0.2 ±0.0   |
| 20:4 $n$ 6 | 0.4 ±0.0  | 0.4 ±0.0  | 0.3 ±0.0   |
| 20:5 $n$ 3 | 17.0 ±0.1 | 8.3 ±0.1  | 6.6 ±0.0   |
| Others     | 0.7 ±0.0  | 0.4 ±0.0  | 0.3 ±0.0   |

© 2013 by the authors; licensee MDPI, Basel, Switzerland. This article is an open access article distributed under the terms and conditions of the Creative Commons Attribution license (<http://creativecommons.org/licenses/by/3.0/>).
